# Supplementary material for: 14-3-3τ drives estrogen receptor loss via ERα36 induction and GATA3 inhibition in breast cancer
Source: PubMed Central journal article supplement — Proc Natl Acad Sci U S A. 2022 Oct 17;119(43):e2209211119. doi: 10.1073/pnas.2209211119 (PMC9618134; doi:10.1073/pnas.2209211119), 2022-10-17
Supplement: pnas.2209211119.sapp.pdf [file pnas.2209211119.sapp.pdf]

**Supporting Information**

**14-3-3 $\tau$  drives estrogen receptor loss via ER $\alpha$ 36 induction and GATA3 inhibition in breast cancer**

Lidija A. Wilhelms Garan, Yang Xiao, and Weei-Chin Lin

Corresponding author:  
Weei-Chin Lin  
Email: weeichil@bcm.edu

**Supplementary data contain:**

**SI Materials and Methods**

**Supplementary Figure S1-S7**

**Supplementary Table S1-S3**

**SI References**

## **SI Materials and Methods**

### **Cell culture**

MCF7, HEK293T, MDA-MB-468 cells were grown in Dulbecco's modified Eagle's medium (DMEM) supplemented with 10% fetal bovine serum (FBS), penicillin (50 IU/ml), streptomycin (50 µg/ml) in a humidified incubator with 5% CO<sub>2</sub> at 37°C. T47D cells were grown in Roswell Park Memorial Institute (RPMI) 1640 media supplemented with 10% FBS, penicillin (50 IU/ml), streptomycin (50 µg/ml) in a humidified incubator with 5% CO<sub>2</sub> at 37°C.

### **Immunofluorescence staining**

Immunofluorescence analysis was performed as described previously (1). Cells were fixed with 4% paraformaldehyde for 10 min, followed by permeabilization with 0.5% Triton-X 100 in 1X phosphate-buffered saline (PBS) for 10 min. The fixed cells were then subjected to blocking with 2% BSA in 1X PBS for two hours, followed by incubation with ER $\alpha$ 66 antibody (Santa Cruz #543) overnight and the Texas Red X- conjugated secondary antibody (Invitrogen, #T6391) for one hour. The fixed cells were then incubated with FITC-FLAG conjugated primary antibody (GeneScript #89493-648) for 2 hours. The nuclei were stained with Hoechst 33258. Images were captured on a Zeiss fluorescence microscope (Axio Observer Inverted Microscope) equipped with ApoTome 2 (Zeiss).

### **Mesenchymal stem cells**

Mesenchymal stem cells were maintained at >70% confluency in Hyclone MEM alpha Modification media supplemented with 10% FBS and differentiated to cancer-associated fibroblasts (CAF) with 1 ng/mL recombinant human transforming growth factor beta 1 (TGF- $\beta$ 1,

Invivogen) added to media daily for 3 days. Differentiation was confirmed by alpha-smooth muscle actin ( $\alpha$ SMA) induction via Western blot analysis.

### **Plasmid Construction**

pQCXIP-14-3-3 $\tau$ -FLAG and sh14-3-3 $\tau$  constructs have been described previously (2). The doxycycline-inducible pXP-YFP and pXP-GATA3 were constructed using a lentiviral cDNA delivery system from Dr. Xuewen Pan (Novartis, Cambridge, MA). The expression vectors for ER $\alpha$ 36 shRNAs were constructed using the pLKO.1-TRC cloning vector (Addgene) digested with AgeI and EcoRI (New England Biolabs). The target sequences are presented in Supplementary Table 1.

### **Virus production and stable cell line generation**

Retrovirus was produced in HEK293T cells. Media was changed 24 hours after transfection. At 72 hours and 96 hours after transfection, the virus-containing media was collected and filtered with a 0.45  $\mu$ m PVDF filter. Stable cell lines were generated by transducing with appropriate virus concurrently with the addition of 8  $\mu$ g/ml Polybrene (Sigma). Seventy-two hours after transduction, 1  $\mu$ g/mL puromycin (Gibco, for 14-3-3 $\tau$  constructs) or 400  $\mu$ g/mL G418 (VWR International, for GATA3 constructs) was added to select for stable cell.

### **Tamoxifen treatment**

Continuous low-dose tamoxifen (CLD-TAM) treated MCF7 and T47D cells were established by culturing ER $\alpha$ 66-positive cell line MCF7 or T47D in medium plus 1  $\mu$ M tamoxifen over 80 days, which was maintained in respective medium continuously.

### **Luciferase reporter assay**

The *ESR1* promoter specific to ER $\alpha$ 36 isoform was cloned using PCR of genomic DNA from -738 to +22 surrounding the TSS. PCR primers contain a XhoI site 5' to the forward cloning primer and a HindIII site 5' to the reverse cloning primer. The following primer pairs were used: forward primer 5'- ACCCTCGAGGGTACCCGCGCCCGC-3' and reverse primer 5'- CCCAAGCTTGGAGATTATTTTAAAGC-3'. PCR product was digested with XhoI and HindIII (Promega) and then ligated together with pGL3-Basic backbone digested with XhoI and HindIII. Luciferase reporter assays were performed using the Promega Dual-Luciferase Reporter Assay System per manufacturer's guidelines. Cells were transiently transfected with 1.5  $\mu$ g ER $\alpha$ 36 promoter luciferase reporter and 0.5  $\mu$ g cytomegalovirus (CMV)- $\beta$ -galactosidase transfection control using PolyJet (SignaGen Laboratories). After treatments, cells were lysed in passive lysis buffer supplemented with protease inhibitors. Samples were then assayed for firefly luciferase signal, followed by  $\beta$ -galactosidase activity assay. Data was analyzed by normalizing individual sample firefly luciferase activity to its respective  $\beta$ -galactosidase activity.

### **Western Blotting**

Cells were harvested with SDS lysis buffer (10 mM Tris-HCl, 2 mM EDTA, 1% SDS) and sonicated briefly. Cell lysates were analyzed by sodium dodecyl sulfate-polyacrylamide gel electrophoresis (SDS-PAGE) and immunoblotting with described antibodies.

### **GST-pulldown assay**

Cells were harvested in NP-40 lysis buffer (50 mM HEPES, pH 7.4, 150 mM NaCl, 1 mM EDTA, 10% glycerol, and 1% NP-40) with protease inhibitor cocktails and sonicated briefly. To detect *in vitro* binding, glutathione *S*-transferase (GST)–14-3-3 $\tau$  protein was purified from *Escherichia coli* and coupled to glutathione-Sepharose beads (GE Healthcare) as described before (3). Cell lysates were incubated with GST or GST–14-3-3 $\tau$  beads overnight at 4°C and then washed three times with cold PBS. The specific signals were detected with appropriate antibodies.

### **Proteasome degradation**

Cells were grown in serum-free media for 24 hours and then treated with 10  $\mu$ M SC-79 for 24 hours. Eighteen hours after SC-79 treatment, cells were treated with 10  $\mu$ M MG-132 (Calbiochem) and harvested 6 hours later with SDS lysis buffer.

### **Antibodies**

The following antibodies were used for Western blotting, immunofluorescence, co-immunoprecipitation, and CHIP assays: E-cadherin (BD Biosciences #610181), ER $\alpha$ 66 (Santa Cruz #543), GAPDH (Santa Cruz #32233), Actin (Sigma #A2066), GST (Santa Cruz #138), 14-3-3 $\tau$  (Santa Cruz #732), GATA3 (Cell Signaling #D13C9), GATA3pS308 (Invitrogen #PA5-104846), ESR1 antibody used to detect ER $\alpha$ 36 (Rockland #600-401-BB9), FLAG (Sigma #F3165), IgG rabbit (Thermo), and  $\alpha$ SMA (Sigma #A2547).

### **RNA extraction and quantitative reverse transcription PCR (RT-qPCR)**

RNA extraction was performed using the standard trizol method (Invitrogen) and qPCR was performed on a MX3000P thermal cycler with SYBR green and ROX reference dye. All primer pairs are described in Supplementary Table 2.

### **Colony Formation Assay**

Six-well plates were seeded with  $5 \times 10^4$  either unconditioned or CLD-TAM conditioned cells in triplicate on Day 0. Starting Day 1, wells were treated daily with 5  $\mu$ M TAM and media changed every other day until Day 14. The plates were gently washed with PBS, fixed with 37% formaldehyde for 45 minutes, stained with crystal violet for 1 hour, washed with distilled water five times, and allowed to dry overnight. The resulting colonies were counted and representative wells imaged.

### **Statistical Analysis**

The Pearson correlation coefficient was calculated to evaluate correlations. The two-tailed probability (*P* values) for each Pearson correlation coefficient was calculated between two experimental groups. Two-tailed *t*-test was also used to analyze significant changes between experimental groups. *P* values of less than 0.05 were considered statistically significant and denoted by \*. *P* values of less than 0.01 were denoted by \*\*; *P* values < 0.001 were denoted by \*\*\*. RNA-Seq and RPPA data in TCGA database and RNA-Seq data in METABRIC breast cancer dataset were extracted from cBioportal server (<https://www.cbioportal.org/>) and GEPIA2 server (<http://gepia2.cancer-pku.cn/#index>) (4). Clinical data in the METABRIC breast cancer dataset were extracted from <https://www.synapse.org/> server. Kaplan-Meier curves were generated using the R program or in KM Plotter. GSE27473 microarray dataset were extracted from NCBI GEO

server. Pan cancer data in TCGA database was extracted and analyzed using TNMplot (<https://tnmplot.com/analysis/>) (5).

Fig. S1

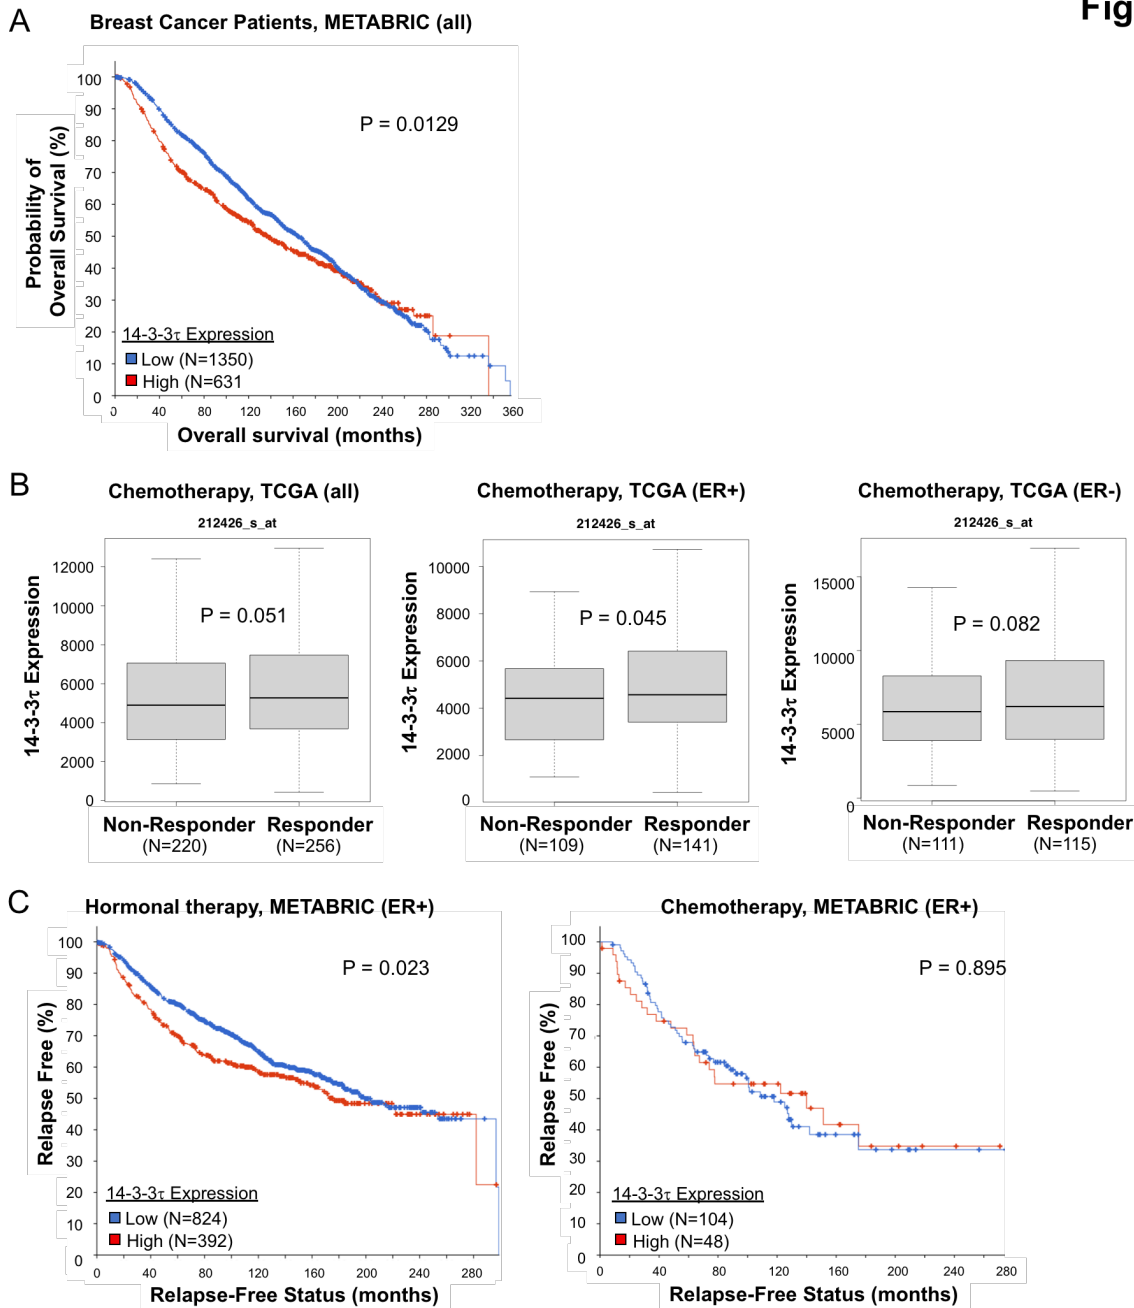

Figure S1.

- METABRIC overall survival analysis showing breast cancer patients with high 14-3-3 $\tau$  expression have shorter overall survival. Patients were split by upper tertile of 14-3-3 $\tau$  expression in their breast cancers.
- The responders to chemotherapy in TCGA breast cancer cohort have marginally higher levels of 14-3-3 $\tau$  expression.
- High 14-3-3 $\tau$  expression (red) only significantly impacts relapse-free survival in METABRIC ER+ patients treated with endocrine therapy, but not with chemotherapy. Patients were split by upper tertile of 14-3-3 $\tau$  expression in their breast cancers.



**Fig. S2**

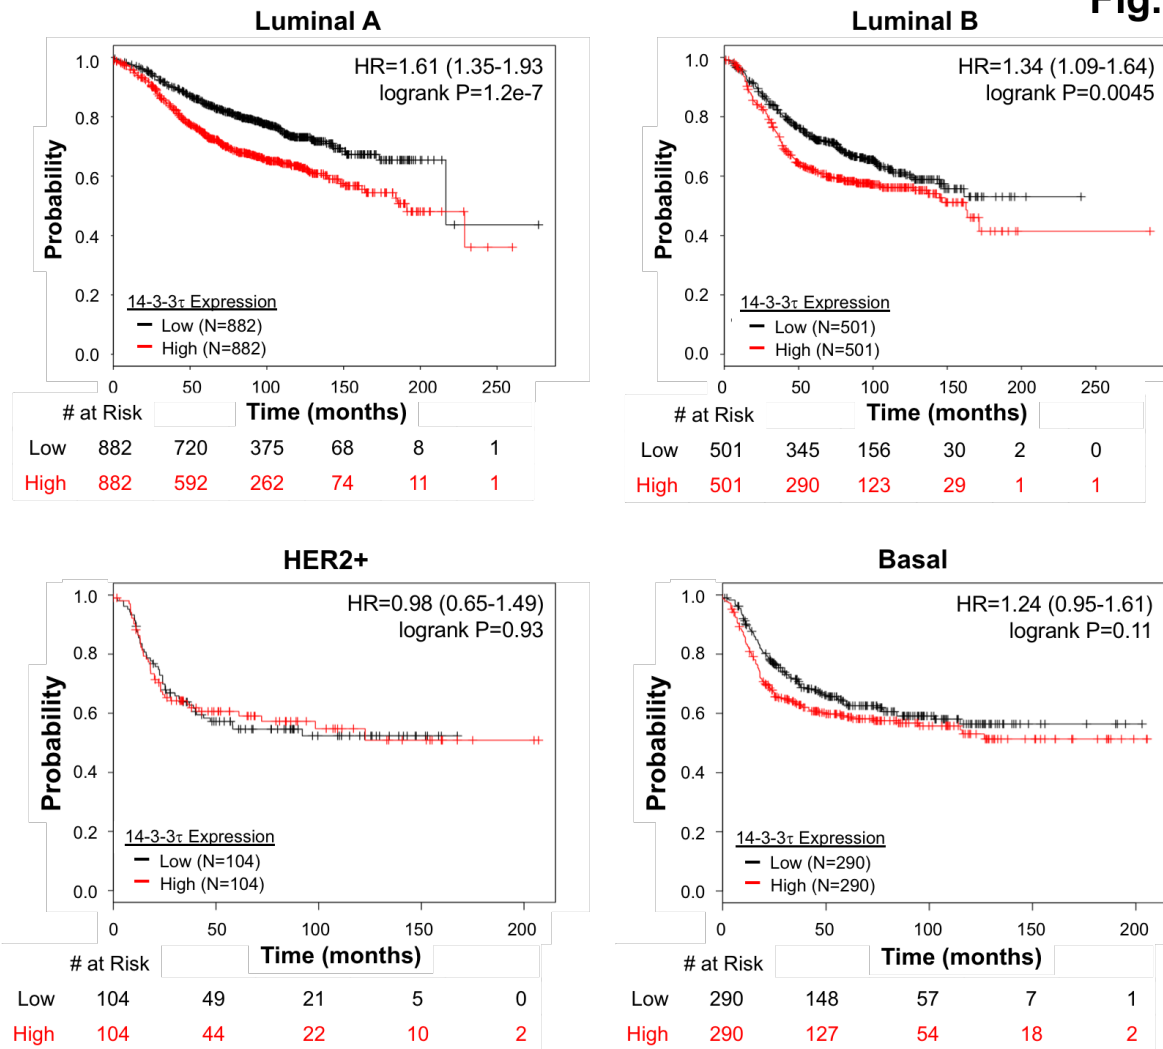

**Figure S2. High 14-3-3 $\tau$  expression is associated with decreased survival in ER+ (luminal A and luminal B) breast cancer but not in HER2 or basal-like breast cancers.**

Relapse-free survival of breast cancer patients with low (black lines) or high (red lines) 14-3-3 $\tau$  expression in primary tumors segregated based on molecular subtype. The effect of 14-3-3 $\tau$  on the risk of relapse is highest in luminal A (Hazard ratio, HR 1.61), followed by luminal B (HR 1.34). The data are analyzed in an online meta-analysis server Kaplan-Meier Plotter (6) from a total of 3554 breast cancer patients. Patients were equally separated into two groups based on the expression of 14-3-3 $\tau$  in their breast cancers. Most Luminal A and Luminal B breast cancer patients were treated with hormonal therapy. HR: hazard ratio.

**Fig. S3**

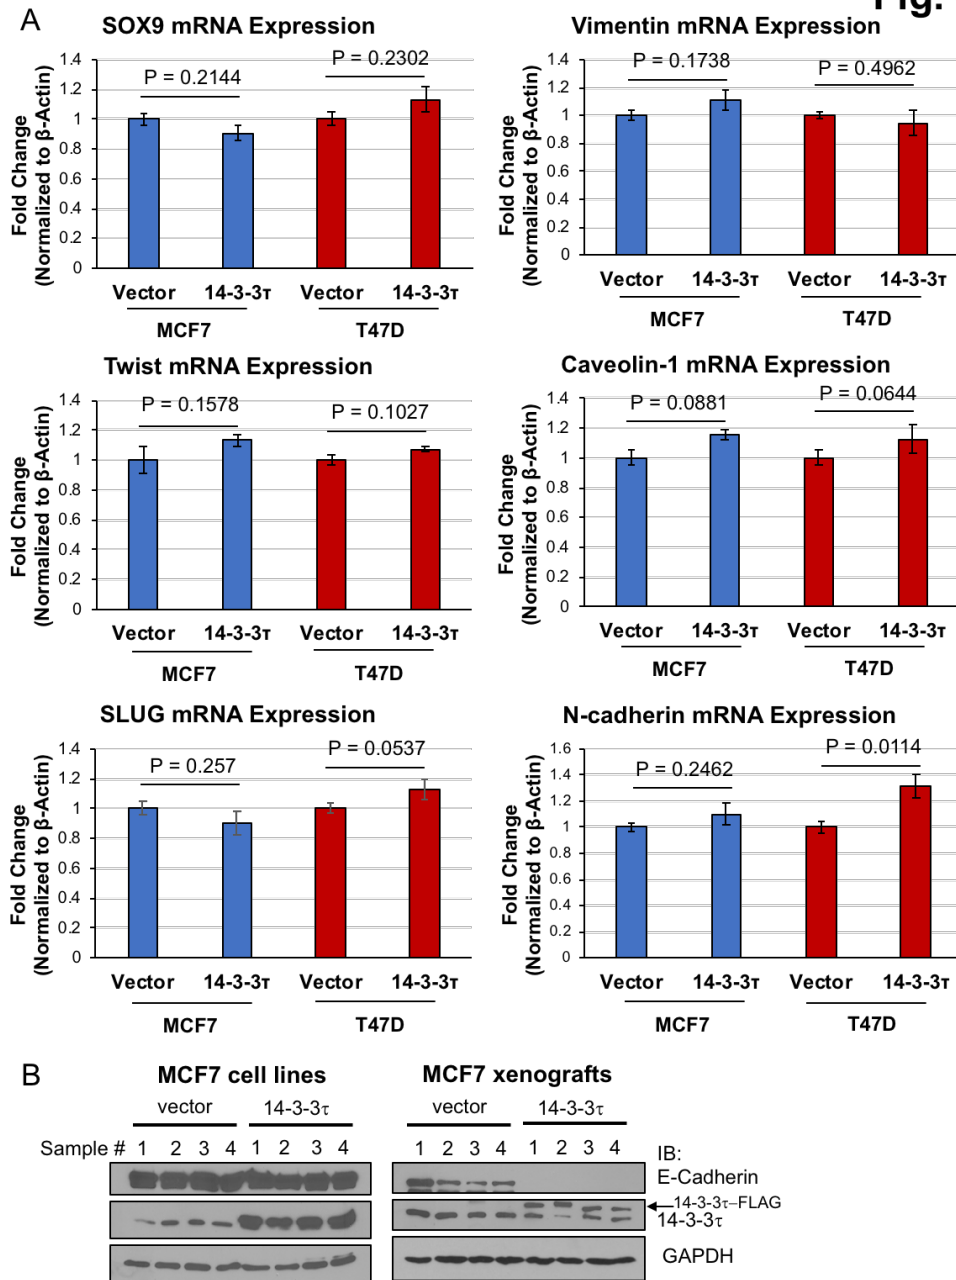

**Figure S3. EMT marker analysis in 14-3-3 $\tau$ -overexpressing cell lines and xenografts.**

- A) There is no pattern or significant difference in mRNA expression of EMT markers (SOX9, Vimentin, Twist, Caveolin-1, SLUG, N-cadherin) between MCF7- and T47D- vector and 14-3-3 $\tau$ -overexpressing cell lines as analyzed by RT-qPCR. Shown are mean  $\pm$  SD (n=3 technical replicates).
- B) Western blot analysis demonstrates no change in E-cadherin protein expression between vector control and 14-3-3 $\tau$ -overexpressing MCF7 cells (n=4 biological replicates per cell line). On the contrary, 14-3-3 $\tau$ -overexpressing MCF7 xenografts completely lost the expression of E-cadherin.

Fig. S4

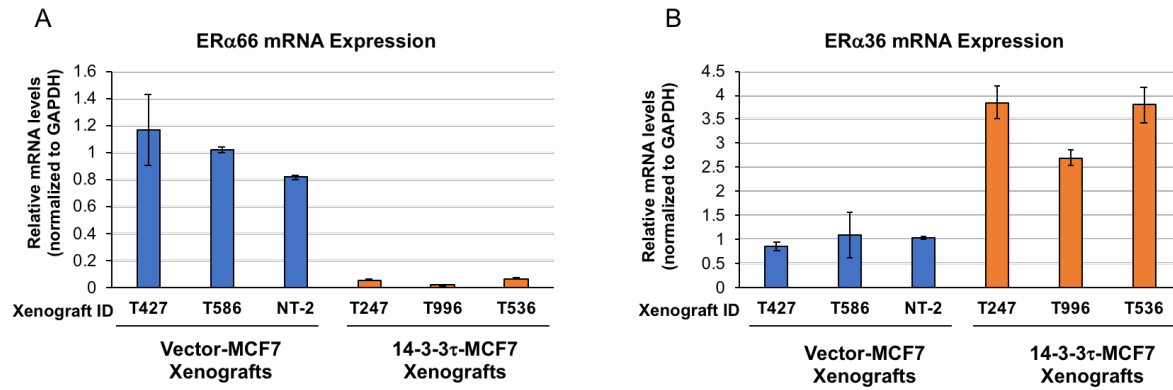

**Figure S4. mRNA analyses of individual xenografts.**

RT-qPCR of ER $\alpha$ 66 and ER $\alpha$ 36 in each xenograft. Shown are mean  $\pm$  SD (n=3 technical replicates). Xenograft ID denotes each individual xenograft from the experiments described previously (2).

**Fig. S5**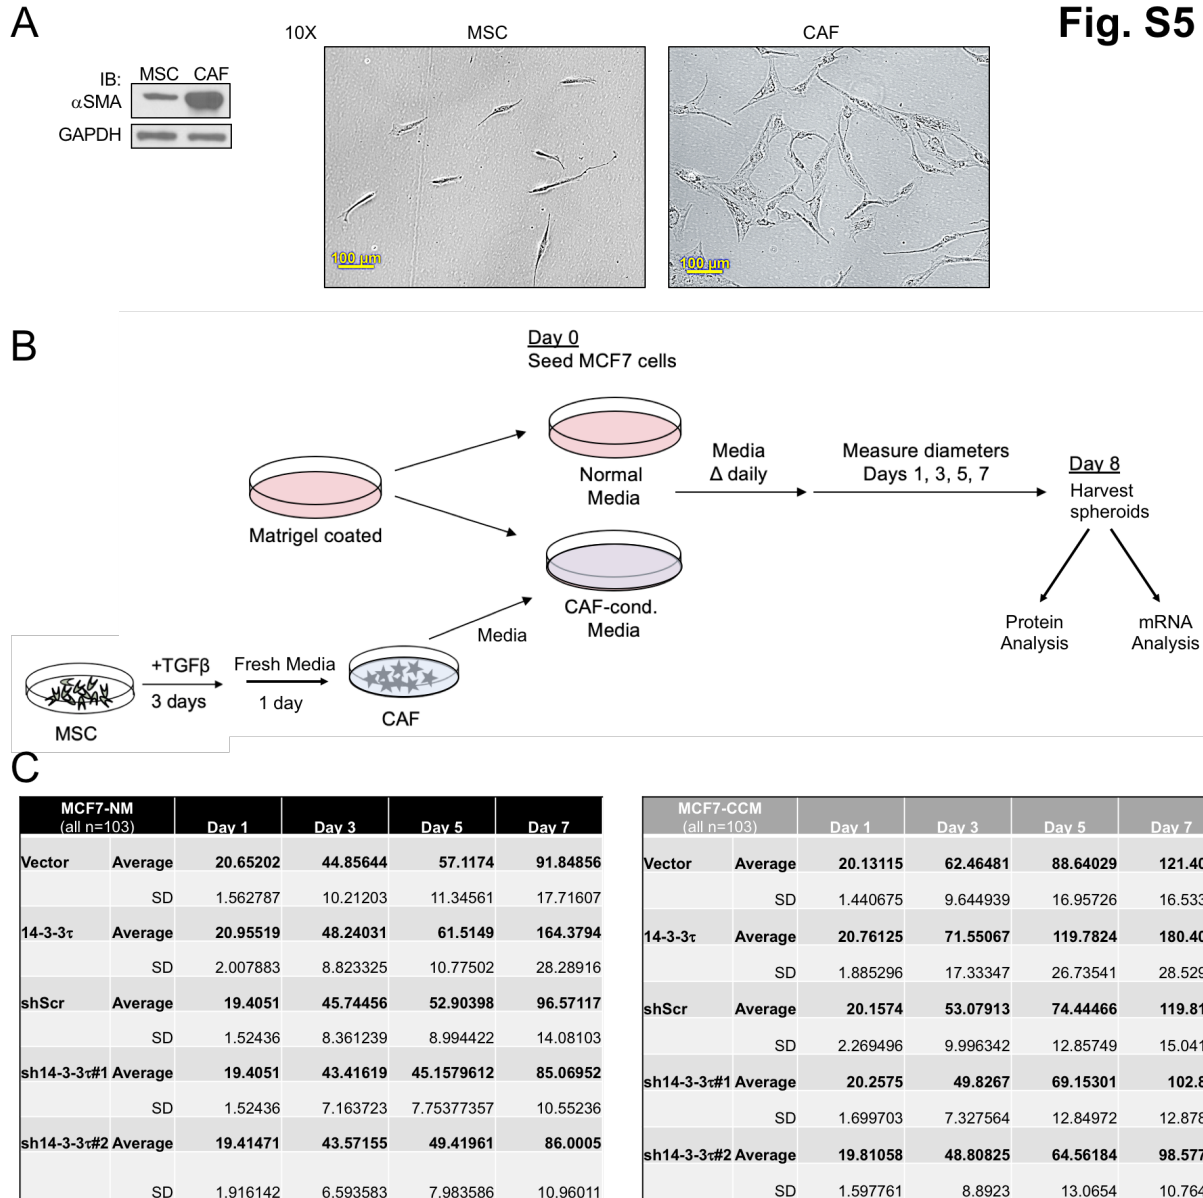**Figure S5. Spheroid model of 14-3-3 $\tau$ -driven ER $\alpha$ 66 loss and EMT induction using CAF-conditioned media.**

- A) Mesenchymal stem cells (MSC) were differentiated to cancer-associated fibroblast (CAF) by TGF $\beta$  treatment. Differentiation was validated by Western blot analysis of  $\alpha$ SMA protein induction and morphological changes characteristic of fibroblasts.
- B) Schematic of methodology for spheroid growth in normal media (NM) or CAF-conditioned media (CCM).
- C) Summary table of average spheroid diameter by day (n=103). Left table is normal media (NM, black) average spheroid diameter and standard deviation, right table is CAF-conditioned media (CCM, gray).

**Fig. S6**

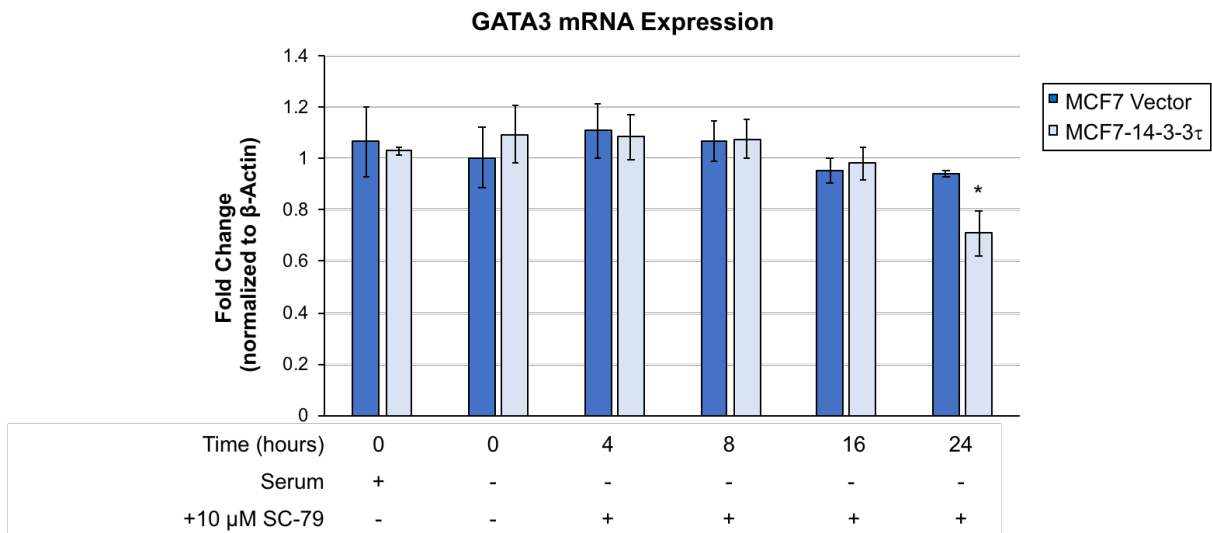

**Figure S6. RT-qPCR analysis of MCF7 vector and MCF7-14-3-3 $\tau$  + SC-79 timecourse.**

There is a significant reduction of GATA3 transcript in MCF7-14-3-3 $\tau$  cells at 24 hours after SC-79 treatment. Data represent mean  $\pm$  SD, (n=3 technical replicates); \* $P$ <0.05, (two-tailed  $t$  test).

**Fig. S7**

| MCF7-14-3-3 $\tau$<br>NM |         | Day 1    | Day 3    | Day 5    | Day 7    |
|--------------------------|---------|----------|----------|----------|----------|
| shScr                    | Average | 20.43337 | 49.82837 | 64.27433 | 161.9161 |
|                          | SD      | 2.076836 | 7.857509 | 9.756186 | 24.58351 |
| shER $\alpha$ 36#1       | Average | 19.42067 | 44.48417 | 51.28427 | 99.66152 |
|                          | SD      | 1.505185 | 5.496481 | 7.3723   | 12.14699 |
| shER $\alpha$ 36#2       | Average | 19.36673 | 46.05223 | 53.4132  | 102.4822 |
|                          | SD      | 1.876936 | 5.495498 | 7.362252 | 12.14214 |

| MCF7-14-3-3 $\tau$<br>CCM |         | Day 1    | Day 3    | Day 5    | Day 7    |
|---------------------------|---------|----------|----------|----------|----------|
| shScr                     | Average | 20.82721 | 75.64721 | 116.1449 | 183.9051 |
|                           | SD      | 1.847193 | 14.38955 | 19.7415  | 25.09211 |
| shER $\alpha$ 36#1        | Average | 20.14856 | 52.92126 | 75.38923 | 121.4924 |
|                           | SD      | 1.410684 | 9.967237 | 11.03059 | 13.42058 |
| shER $\alpha$ 36#2        | Average | 19.78173 | 50.11845 | 74.01558 | 120.072  |
|                           | SD      | 1.619247 | 10.08992 | 11.03944 | 13.44223 |

**Figure S7. Summary of average spheroid diameter by day.**

Left table is normal media (NM, black) average spheroid diameter and standard deviation, right table is CAF-conditioned media (CCM, gray).

**Supplementary Tables:**

Supplementary Table 1. Target nucleotide sequences in ER $\alpha$ 36-specific exon for shER $\alpha$ 36

|                    | Sense                 | Antisense             |
|--------------------|-----------------------|-----------------------|
| shER $\alpha$ 36-1 | CTCACATGTAGAAGCAAAGAA | TTCTTTGCTTCTACATGTGAG |
| shER $\alpha$ 36-2 | ATGTAGAAGCAAAGAAGAGAA | TTCTCTTCTTTGCTTCTACAT |

Supplementary Table 2. Primer pairs for RT-qPCR (5' to 3')

|                | Forward Primer          | Reverse Primer           |
|----------------|-------------------------|--------------------------|
| ER $\alpha$ 66 | CACTCAACAGCGTGTCTCCGA   | CCAATCTTTCTCTGCCACCCTG   |
| ER $\alpha$ 36 | CAAGTGGTTTCCTCGTGTCTA   | TGTTGAGTGTTGGTTGCCAGG    |
| $\beta$ -Actin | CACCAACTGGGACGACAT      | ACAGCCTGGATAGCAACG       |
| Vimentin       | ACATGCTGTTTCCTGAATCTGAG | GTCTTGACCTTGAACGCAAAG    |
| GATA3          | ACCACAACCACACTCTGGAGGA  | TCGGTTTCTGGTCTGGATGCCT   |
| SOX9           | AGGAAGCTCGCGGACCAGTAC   | GGTGGTCCTTCTTGTGCTGCAC   |
| Twist          | CCAGGTACATCGACTTCCTCT   | TCCATCCTCCAGACCGAGAAGG   |
| Caveolin-1     | TTCTCTTTGCCACCCTCAGCTG  | GAAGCATCGTCCTACGCTCGTA   |
| Claudin-7      | GGAGACGACAAAGTGAAGAAGGC | AAAAGTCTGTGACAATCTGATGGC |
| SLUG           | ATCTGCGGCAAGGCGTTTTCCA  | GAGCCCTCAGATTTGACCTGTC   |

Supplementary Table 3. ChIP Primer Pairs for Gene Promoter Regions (5' to 3')

|  | Forward Primer | Reverse Primer |
|--|----------------|----------------|
|--|----------------|----------------|

|                |                        |                        |
|----------------|------------------------|------------------------|
| ER $\alpha$ 66 | CCGCCCCATTCTACCATTCT   | TCCTTCCATAAACTGTCCGGT  |
| ER $\alpha$ 36 | CAGGCAAATAAACACGGGGC   | CTCTAAAGCCCCAGGACGTG   |
| Gene Desert    | TGAGCATTCCAGTGATTTATTG | AAGCAGGTAAAGGTCCATATTC |

### SI References:

1. Ho SR, Mahanic CS, Lee YJ, & Lin WC (2014) RNF144A, an E3 ubiquitin ligase for DNA-PKcs, promotes apoptosis during DNA damage. *Proc Natl Acad Sci U S A* 111(26):E2646-2655.
2. Xiao Y, *et al.* (2014) 14-3-3tau promotes breast cancer invasion and metastasis by inhibiting RhoGDIalpha. *Mol Cell Biol* 34(14):2635-2649.
3. Wang B, *et al.* (2010) 14-3-3Tau regulates ubiquitin-independent proteasomal degradation of p21, a novel mechanism of p21 downregulation in breast cancer. *Mol Cell Biol* 30(6):1508-1527.
4. Tang Z, Kang B, Li C, Chen T, & Zhang Z (2019) GEPIA2: an enhanced web server for large-scale expression profiling and interactive analysis. *Nucleic Acids Res* 47(W1):W556-W560.
5. Bartha A & Gyorffy B (2021) TNMplot.com: A Web Tool for the Comparison of Gene Expression in Normal, Tumor and Metastatic Tissues. *Int J Mol Sci* 22(5).
6. Gyorffy B (2021) Survival analysis across the entire transcriptome identifies biomarkers with the highest prognostic power in breast cancer. *Comput Struct Biotechnol J* 19:4101-4109.
